# Supplementary material for: Unusual echolocation behaviour of the common sword-nosed bat Lonchorhina aurita: an adaptation to aerial insectivory in a phyllostomid bat?
Source: R Soc Open Sci. 2019 Jul 31;6(7):182165. doi: 10.1098/rsos.182165 (PMC6689612; doi:10.1098/rsos.182165)
Supplement: Bandwidth of the constant frequency component (CF) [file rsos182165supp1.xlsx]

## Sheet: Tabelle1
Sequence	f(min)	f(max)	Bandwidth [kHz]		mean	587
1	46086	46673	587		SD	195.7
2	46673	47260	587
4	46966	47553	587
14	47553	47847	294
15	47260	47847	587
16	46086	46379	293
17	46966	47847	881
18	43444	44031	587
19	43444	44324	880
20	43150	43737	587
